# Supplementary material
Source: Springer Nature journal article supplement (https://www.springermedizin.de/resource/supplementary/13069_2011_107_MOESM9_ESM.pdf/9659770)

TGF- $\beta$ 1

-

24h

48h

SRp20

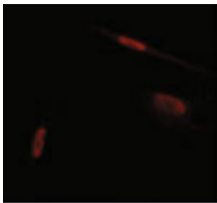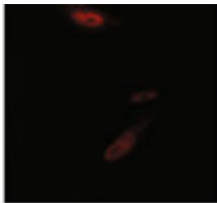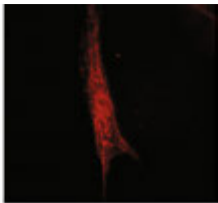

DAPI

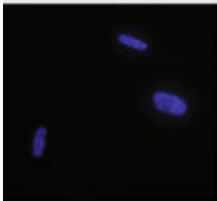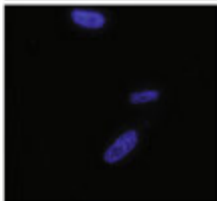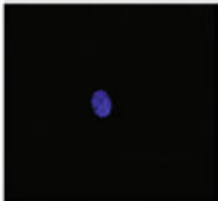

merge

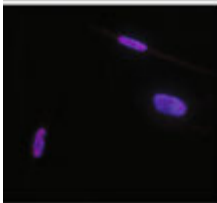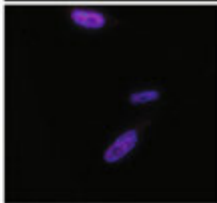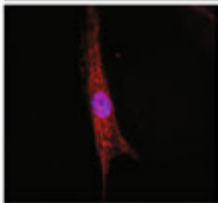

Supplement: MOESM9 [file 9659770]
